# Supplementary material
Source: MDPI journal article supplement (https://www.mdpi.com/2076-0760/10/6/216)
Supplement: s1 [file s1]

## SUPPLEMENTARY MATERIALS

1. JOINT DISTRIBUTION OF HELPING AND KINSHIP TIES
2. NON-PARAMETRIC MEAN COMPARISON OF NETWORK KIN SUPPORT BY ECONOMIC STRATEGY
3. SENSITIVITY ANALYSES USING ALTERNATIVE MEASURES OF HOUSEHOLD ECONOMIC STRATEGY
4. SENSITIVITY ANALYSIS USING HOUSEHOLD MATERIAL WEALTH INCLUDING OUTLIERS
5. DIAGNOSTICS FOR BETA AND POISSON REGRESSION ON AGGREGATE HOUSEHOLD DATA
6. SRM MODEL SPECIFICATIONS AND DIAGNOSTIC PLOTS

## JOINT DISTRIBUTION OF HELPING AND KINSHIP TIES

Support networks of all types are predominantly composed of closely related kin. SM Table 1 and SM Figure 1 highlight the distribution of between household relatedness by type of support.

| <b>Table S1.</b> Distribution of Kin Ties in Household Support Networks. |      |         |     |     |      |       |    |              |
|--------------------------------------------------------------------------|------|---------|-----|-----|------|-------|----|--------------|
| Total                                                                    | Ties | Density | R5  | R25 | R125 | R0625 | R0 | Mean Coef. R |
| Borrow Money                                                             | 125  | 0.0176  | 99  | 13  | 6    | 3     | 3  | 0.45         |
| Borrow Items                                                             | 254  | 0.037   | 147 | 42  | 22   | 10    | 10 | 0.348        |
| Women's Help                                                             | 183  | 0.02    | 157 | 13  | 4    | 1     | 1  | 0.579        |
| Men's Help                                                               | 201  | 0.0239  | 155 | 30  | 5    | 2     | 2  | 0.522        |
| Any Help                                                                 | 492  | 0.0642  | 324 | 72  | 34   | 16    | 16 | 0.433        |

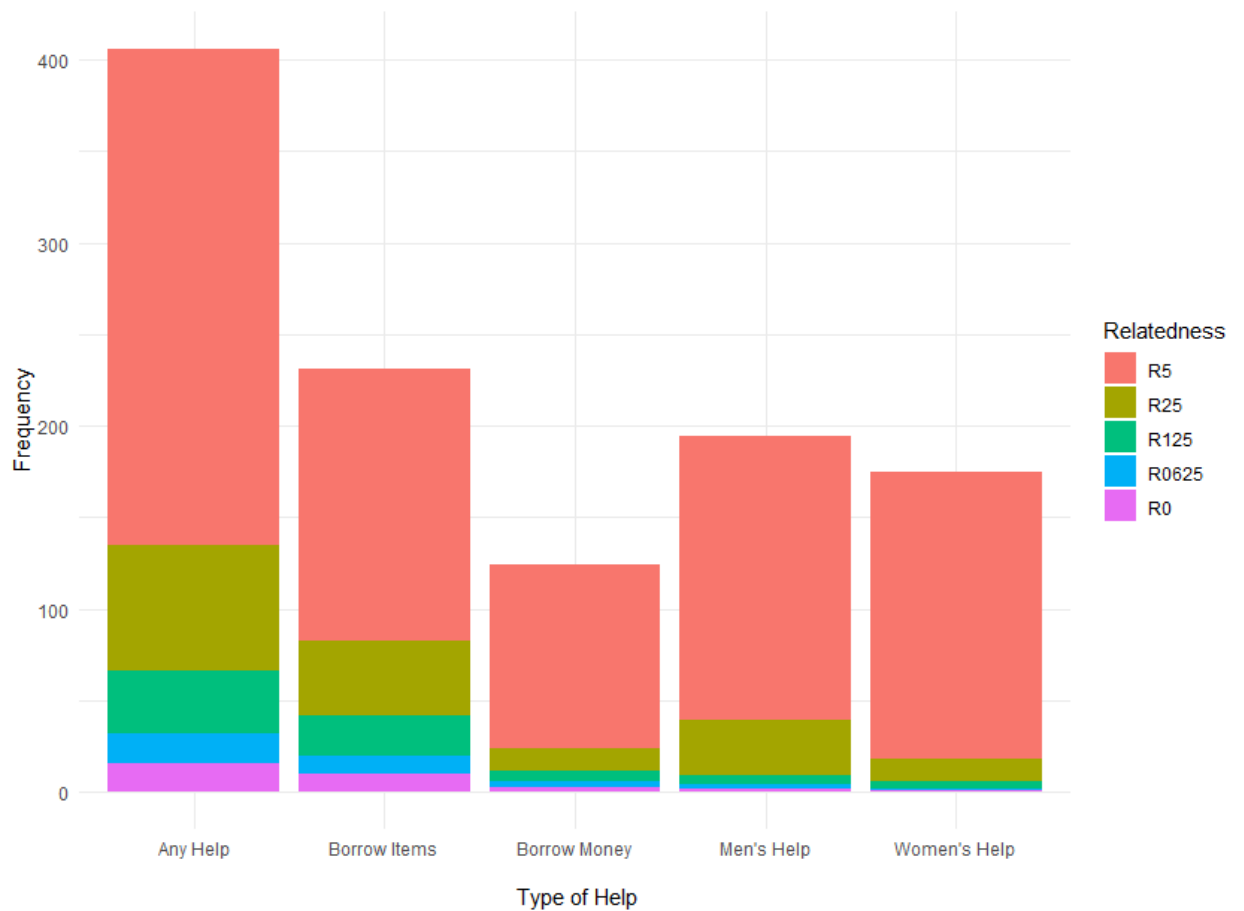

**Figure S1.** Distribution of Kin in support networks by support type.

**NON-PARAMETRIC MEAN COMPARISON OF NETWORK KIN SUPPORT BY  
ECONOMIC STRATEGY**

| <b>Table S2.</b> Dunn's Mean Comparison Tests of Average Proportion of Kin in Support Networks by<br>Economic Strategy |                       |    |    |           |      |       |
|------------------------------------------------------------------------------------------------------------------------|-----------------------|----|----|-----------|------|-------|
| Group 1                                                                                                                | Group 2               | n1 | n2 | statistic | p    | p.adj |
| Subsistence Agriculture                                                                                                | Intensive Agriculture | 8  | 29 | 0.86      | 0.39 | 1.00  |
| Subsistence Agriculture                                                                                                | Mixed                 | 8  | 30 | 2.20      | 0.03 | 0.17  |
| Subsistence Agriculture                                                                                                | Wage Labor            | 8  | 15 | -0.52     | 0.60 | 1.00  |
| Intensive Agriculture                                                                                                  | Mixed                 | 29 | 30 | 2.04      | 0.04 | 0.25  |
| Intensive Agriculture                                                                                                  | Wage Labor            | 29 | 15 | -1.80     | 0.07 | 0.43  |
| Mixed                                                                                                                  | Wage Labor            | 30 | 15 | -3.49     | 0.00 | 0.00  |

# SENSITIVITY ANALYSES USING ALTERNATIVE MEASURES OF HOUSEHOLD ECONOMIC STRATEGY

| <b>Table S3. OLS Regression of Total Number of Kin Ties and Proportion of Kin Ties in Support Networks</b> |                |              |              |                        |              |              |
|------------------------------------------------------------------------------------------------------------|----------------|--------------|--------------|------------------------|--------------|--------------|
|                                                                                                            | Total Kin Ties |              |              | Proportion of Kin Ties |              |              |
|                                                                                                            | Estimate       | Std. Error   | p-value      | Estimate               | Std. Error   | p-value      |
| Intercept                                                                                                  | <b>1.038</b>   | <b>0.489</b> | <b>0.037</b> | <b>0.844</b>           | <b>0.087</b> | <b>0.000</b> |
| Proportion of Wage Labor                                                                                   | -0.646         | 0.708        | 0.364        | -0.063                 | 0.118        | 0.593        |
| Proportion of Agricultural Workers                                                                         | <b>1.744</b>   | <b>0.807</b> | <b>0.034</b> | <b>0.334</b>           | <b>0.137</b> | <b>0.017</b> |
| Total Support Ties                                                                                         | <b>0.491</b>   | <b>0.060</b> | <b>0.000</b> | <b>-0.026</b>          | <b>0.011</b> | <b>0.014</b> |

Higher levels of both total kin ties and proportion of kin ties with greater proportion of household adults engaged in agricultural labor.

| <b>Table S4. OLS Regression Predicting Household Economic Status</b> |              |             |             |                   |                |             |                 |                 |             |
|----------------------------------------------------------------------|--------------|-------------|-------------|-------------------|----------------|-------------|-----------------|-----------------|-------------|
|                                                                      | Log Income   |             |             | Income Per Capita |                |             | Material Wealth |                 |             |
|                                                                      | Estimate     | Std. Error  | p-value     | Estimate          | Std. Error     | p-value     | Estimate        | Std. Error      | p-value     |
| (Intercept)                                                          | <b>9.53</b>  | <b>0.30</b> | <b>0.00</b> | <b>8116.08</b>    | <b>4430.28</b> | <b>0.07</b> | 3810.10         | 38272.20        | 0.92        |
| Economic Diversity                                                   | <b>0.18</b>  | <b>0.07</b> | <b>0.01</b> | <b>2981.67</b>    | <b>989.83</b>  | <b>0.00</b> | <b>18439.40</b> | <b>8438.30</b>  | <b>0.03</b> |
| Age of Male Head of Household                                        | 0.00         | 0.00        | 0.71        | -27.06            | 53.61          | 0.62        | <b>964.70</b>   | <b>455.40</b>   | <b>0.04</b> |
| Proportion of Wage Labor                                             | <b>0.99</b>  | <b>0.34</b> | <b>0.01</b> | <b>13584.45</b>   | <b>5032.74</b> | <b>0.01</b> | <b>92807.70</b> | <b>42799.80</b> | <b>0.03</b> |
| Proportion of Agricultural Workers                                   | <b>-0.82</b> | <b>0.34</b> | <b>0.02</b> | <b>14754.51</b>   | <b>5017.74</b> | <b>0.00</b> | 16593.80        | 42621.20        | 0.70        |
| Proportion of Kin Help                                               | <b>-0.70</b> | <b>0.27</b> | <b>0.01</b> | <b>8599.44</b>    | <b>3937.49</b> | <b>0.03</b> | 22794.50        | 33784.70        | 0.50        |

Both log income and income per capita positively associated with proportion of wage-laborers and negatively associated with both proportion of agricultural workers and proportion of support coming

from kin. For material wealth, proportion of wage-labor negatively associated with wage-labor households.

## SENSITIVITY ANALYSIS USING HOUSEHOLD MATERIAL WEALTH INCLUDING OUTLIERS

**Table S5.** Material wealth with uncoded outliers

|                                      | Material Wealth                         |
|--------------------------------------|-----------------------------------------|
| Intercept                            | -9,938.09 (-108,087.70, 88,211.56)      |
| <b>Economic Diversity</b>            | <b>20,645.38* (1,630.51, 39,660.24)</b> |
| <b>Age of Male Head of Household</b> | <b>-860.72* (-1,844.78, 123.35)</b>     |
| Intensive Agriculture                | 41,128.55 (-13,712.22, 95,969.31)       |
| Mixed                                | 2,877.27 (-55,000.52, 60,755.06)        |
| Wage Labor                           | -14,466.72 (-74,921.49, 45,988.04)      |
| Proportion of Kin Help               | 17,896.83 (-54,399.98, 90,193.63)       |
| Total Number of Help Ties            | -3,747.60 (-10,770.55, 3,275.35)        |
| Observations                         | 80                                      |
| R <sup>2</sup>                       | 0.13                                    |
| Adjusted R <sup>2</sup>              | 0.04                                    |
| Note:                                | 65,318.40 (df = 72)                     |

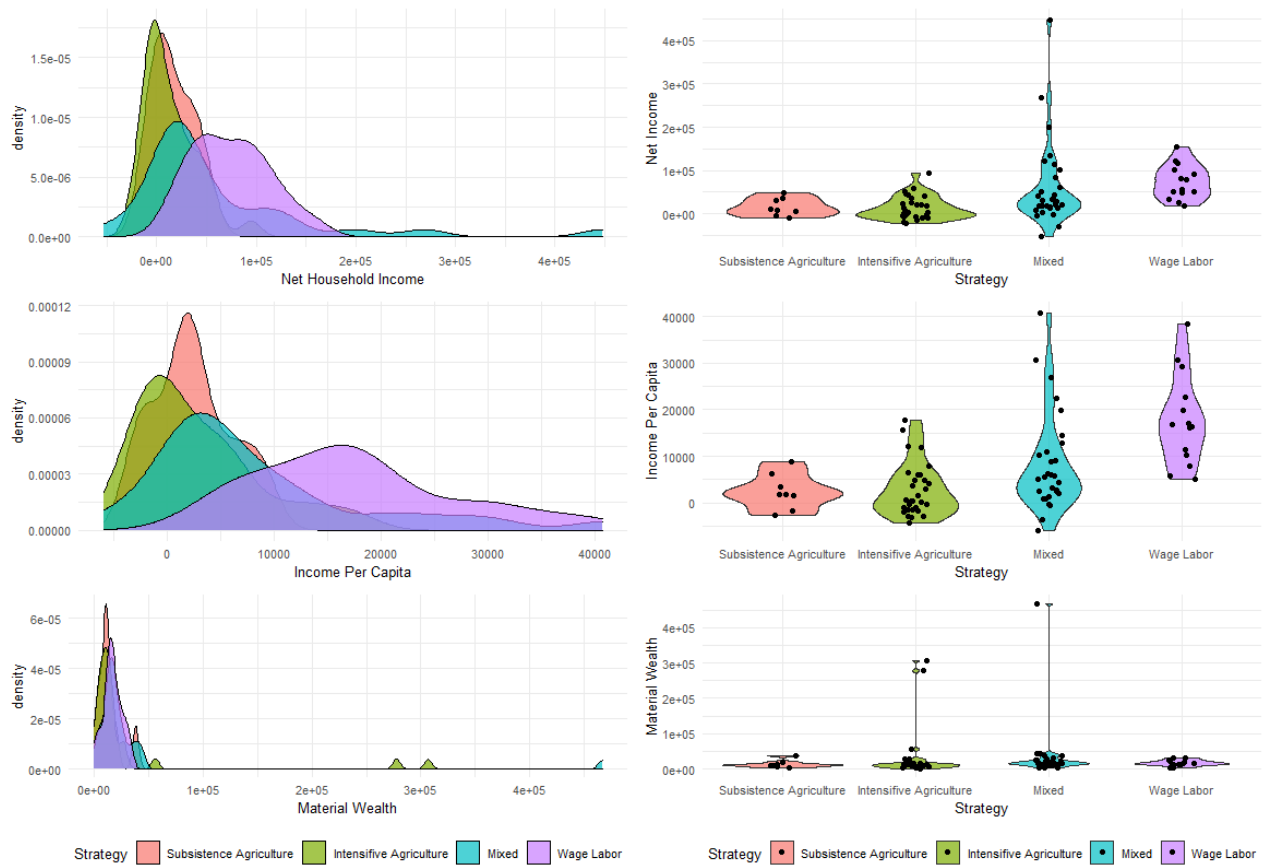

**Figure S2.** Economic outcomes with un-recoded material wealth distributions

### DIAGNOSTICS FOR BETA AND POISSON REGRESSION ON AGGREGATE HOUSEHOLD DATA

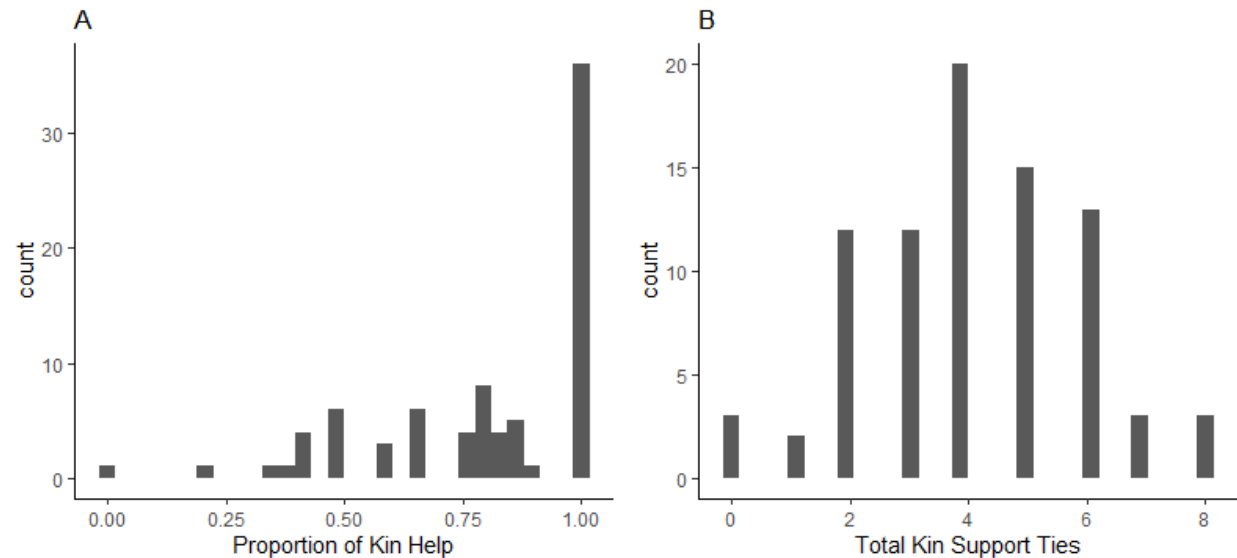

**Figure S3.** Distribution of proportion of kin help and total kin support ties.

Modelling the proportion of ties composed of kin (SM Figure 3: Panel A) we employ a zero-one inflated beta regression to account for the large number of 1's present in the data. Modelling total kin ties (SM Figure 3: Panel B) we employ the Conway-Maxwell Poisson Regression. While the distribution of the total number of kin ties reflect count data, for which a poisson regression is appropriate, dispersion tests indicate significant under-dispersion in the data. The Conway-Maxwell Poisson Regression provides more accurate standard errors for under-dispersed count data than standard poisson regression models.

## SRM MODEL SPECIFICATIONS AND DIAGNOSTICS

The Social Relations Model is an additive random effects model that can be fit for binary outcomes using the `ame` function in the `amen` package in R. The `ame` function initiates an iterative Markov chain Monte Carlo (MCMC) algorithm to produce Bayesian inference for the model parameters, including the covariance parameters. The z-statistic is the posterior means divided by their posterior standard deviation, and the p-value is the probability that a standard normal random variable exceeds the absolute value of the corresponding z-statistic. We specified a 1,000 iteration burn-in with a 10,000 iterations to construct the posterior parameter distributions.

Diagnostic plots show the traceplots of the parameter values simulated from the posterior distribution. The regression parameters on the right, and the covariance parameters on the left. The second two rows provide the 1) Empirical standard deviation of the row means, 2) Empirical standard deviation of the column means, 3) The empirical within-dyad correlation, 4) A normalized measure of cycle and triadic dependence. Large discrepancies between the posterior predictive distributions and the empirical means generally mean lack of model fit. For all three models, the observed variances fit adequately with the posterior predictive distributions, though the column means (which correspond to the Receiver effects in the model).

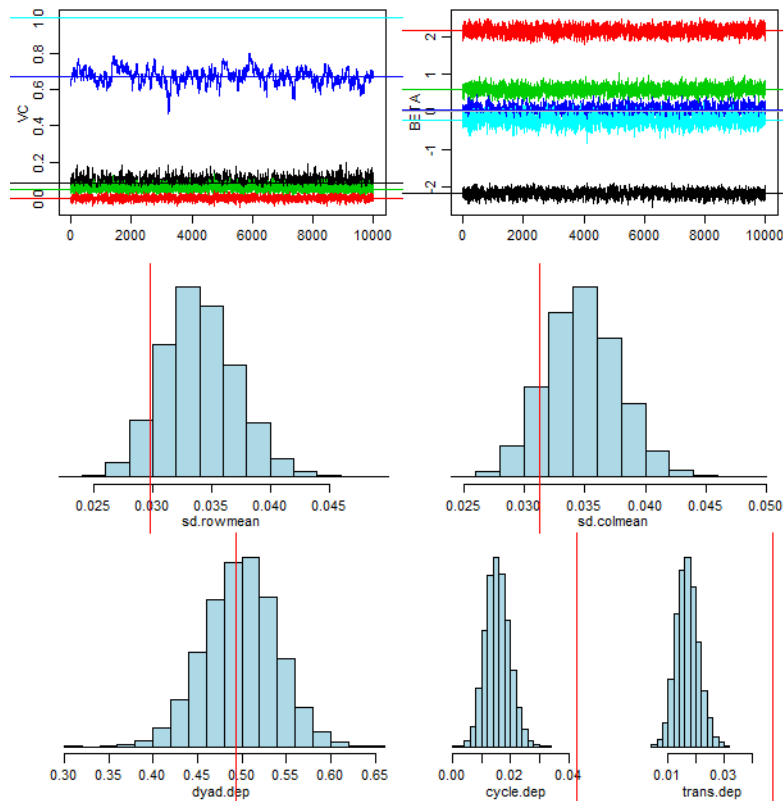

**Figure S4 – SRM Diagnostic Plots for Dyad only model**



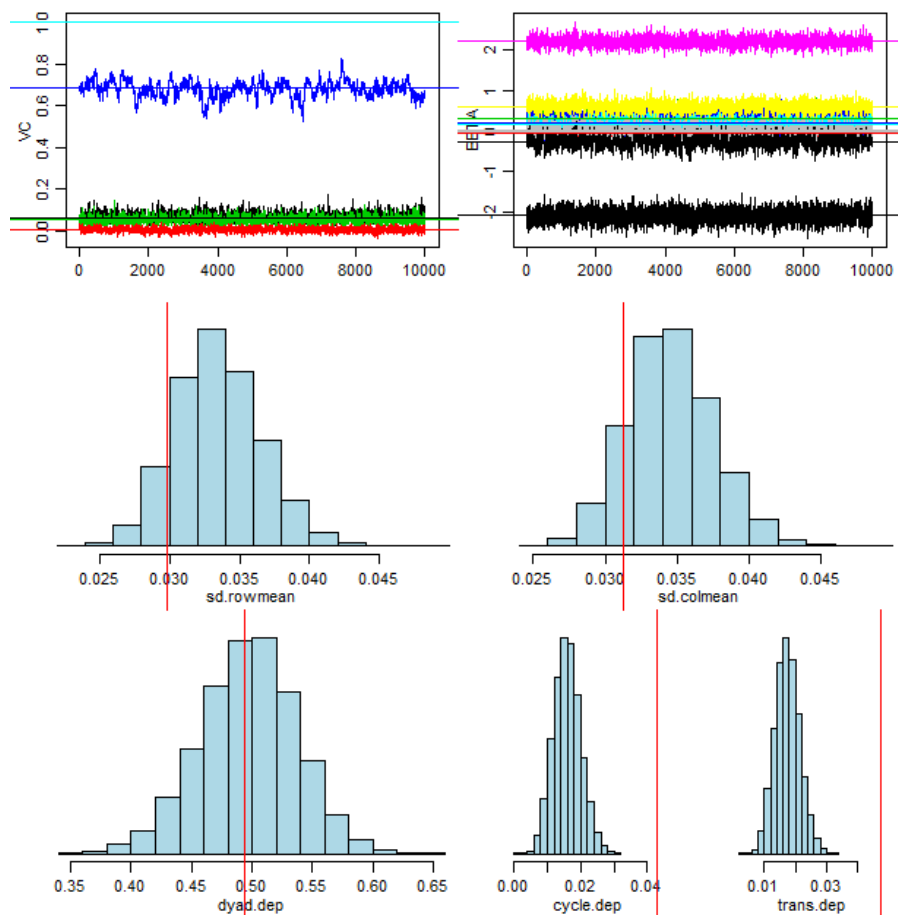

**Figure S5 – SRM Diagnostic plots for Dyad+Sender Effects**

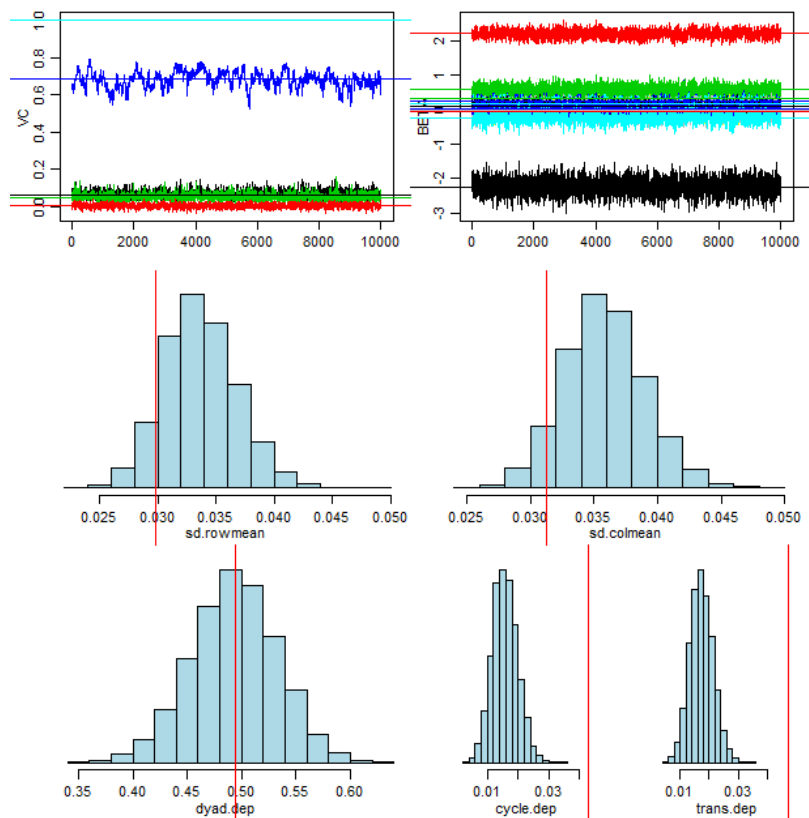

**Figure S6** – SRM Diagnostic plots for Dyad+Sender+Receiver Effects
